# Supplementary material for: Structural Insights into a Wildtype Domain of the Oncoprotein E6 and Its Interaction with a PDZ Domain
Source: PubMed Central journal article supplement (PMC3640046; doi:10.1371/journal.pone.0062584), 2013-04-30
Supplement: pone.0062584.s006.pdf [file pone.0062584.s006.pdf]

**Table S2. Final screening results of E6 constructs for NMR spectroscopy.**

| Construct | Monodispersity | HSQC   | Long-term stability |
|-----------|----------------|--------|---------------------|
| 51Z2      | Passed         | Passed | Passed              |
| 26Z2      | Passed         | Passed | Failed              |
| 18Z2      | Passed         | Failed |                     |
| 45Z2      | Passed         | Failed |                     |
| 16Z2      | Failed         |        |                     |
| 31Z2      | Failed         |        |                     |
| 97Z2      | Failed         |        |                     |

Purified, soluble E6 constructs (compare Table S1) were screened for monodispersity by gel-filtration and dynamic light scattering. Monodisperse constructs always behaved as monomers. For those constructs,  $[^1\text{H},^{15}\text{N}]$ -HSQC were recorded and assessed. This test was considered as passed when the number of amino acids in the construct was matching with the number of observable amide resonances and the resonances in turn exhibited similar peak intensities. Long-term stability was considered as passed when no spectral changes occurred after two weeks post acquisition of the first  $[^1\text{H},^{15}\text{N}]$ -HSQC.
