# Supplementary material for: Structural Insights into a Wildtype Domain of the Oncoprotein E6 and Its Interaction with a PDZ Domain
Source: PubMed Central journal article supplement (PMC3640046; doi:10.1371/journal.pone.0062584), 2013-04-30
Supplement: pone.0062584.s007.pdf [file pone.0062584.s007.pdf]

**Table S3. Details of NMR experiments and samples for the 51Z2 structure determination.**

| Experiment                                        | Data points, NS ( $t_{\text{mix}}$ ) | Sample / Solvent            |
|---------------------------------------------------|--------------------------------------|-----------------------------|
| $^1\text{H}$ - $^{15}\text{N}$ ]-HSQC             | 2048/256, 4                          | 1.13 mM in H <sub>2</sub> O |
| HNCACB                                            | 2048/64/160, 32                      | 1.13 mM in H <sub>2</sub> O |
| CC(CO)NH                                          | 2048/96/168, 16                      | 1.13 mM in H <sub>2</sub> O |
| H(CCCO)NH                                         | 2048/64/128, 32                      | 1.13 mM in H <sub>2</sub> O |
| HNCO                                              | 2048/64/128, 8                       | 1.13 mM in H <sub>2</sub> O |
| HNHA                                              | 2048/128/96, 16                      | 1.13 mM in H <sub>2</sub> O |
| HN(CA)CO                                          | 2048/64/128, 32                      | 1.13 mM in H <sub>2</sub> O |
| $^1\text{H}$ - $^{15}\text{N}$ ]-NOESY-HSQC       | 2048/96/280, 16 (180 ms)             | 1.13 mM in H <sub>2</sub> O |
| $^1\text{H}$ - $^{13}\text{C}$ ]-HSQC (ali)       | 1024/128, 16                         | 1.13 mM in H <sub>2</sub> O |
| $^1\text{H}$ - $^{13}\text{C}$ ]-HSQC (ali)       | 1024/128, 16                         | 0.90 mM in D <sub>2</sub> O |
| H(C)CH-TOCSY                                      | 2048/128/144, 8 (12 ms)              | 0.90 mM in D <sub>2</sub> O |
| H(C)CH-COSY                                       | 2048/128/128, 16                     | 0.90 mM in D <sub>2</sub> O |
| $^1\text{H}$ - $^{13}\text{C}$ ]-NOESY-HSQC (ali) | 2048/192/256, 8 (120 ms)             | 0.90 mM in D <sub>2</sub> O |
| $^1\text{H}$ - $^{13}\text{C}$ ]-HSQC (aro)       | 1024/256, 4                          | 0.90 mM in D <sub>2</sub> O |
| (HB)CB(CGCD)HD                                    | 1024/128, 448                        | 0.90 mM in D <sub>2</sub> O |
| (HB)CB(CGCDCE)HE                                  | 1024/128, 512                        | 0.90 mM in D <sub>2</sub> O |
| H(CC)H-COSY aro.                                  | 2048/608, 64                         | 1.00 mM in D <sub>2</sub> O |
| $^1\text{H}$ - $^{13}\text{C}$ ]-NOESY-HSQC (aro) | 2048/80/1024, 8 (120 ms)             | 1.00 mM in D <sub>2</sub> O |

Bruker AvanceIII NMR spectrometers with  $^1\text{H}$  resonance frequencies of 750 MHz or 600 MHz were utilized. All experiments were performed with  $^{13}\text{C}$  and  $^{15}\text{N}$ -labeled 51Z2 and the respective implementations of pulse programs in the TOPSPIN v. 2.1 software bundle. Resolution, number of scans (NS) and, where appropriate, mixing times ( $t_{\text{mix}}$ ) are given. Protein concentration was determined spectrophotometrically using a molar extinction coefficient of  $13980 \text{ M}^{-1} \text{ cm}^{-1}$  as calculated from the amino acid sequence by the Protparam tool [1] at [www.expasy.org/protparam/](http://www.expasy.org/protparam/). Spectra were recorded at 283 K. 51Z2 buffer conditions were 90 mM NaCl, 45 mM L-arginine, 45 mM L-glutamate, 9 mM DTT, 0.05 % (w/v) NaN<sub>3</sub>, pH 7.4 in 90% H<sub>2</sub>O/10% D<sub>2</sub>O or in 100% D<sub>2</sub>O.
